# Supplementary material for: Response of Soil CO2 Emission to Addition of Biochar and Dissolved Organic Carbon along a Vegetation Restoration Gradient of Subtropical China
Source: MDPI journal article supplement (doi:10.3390/f15050753), 2024-04-25
Supplement: s1 [file s1]

## Supplementary materials

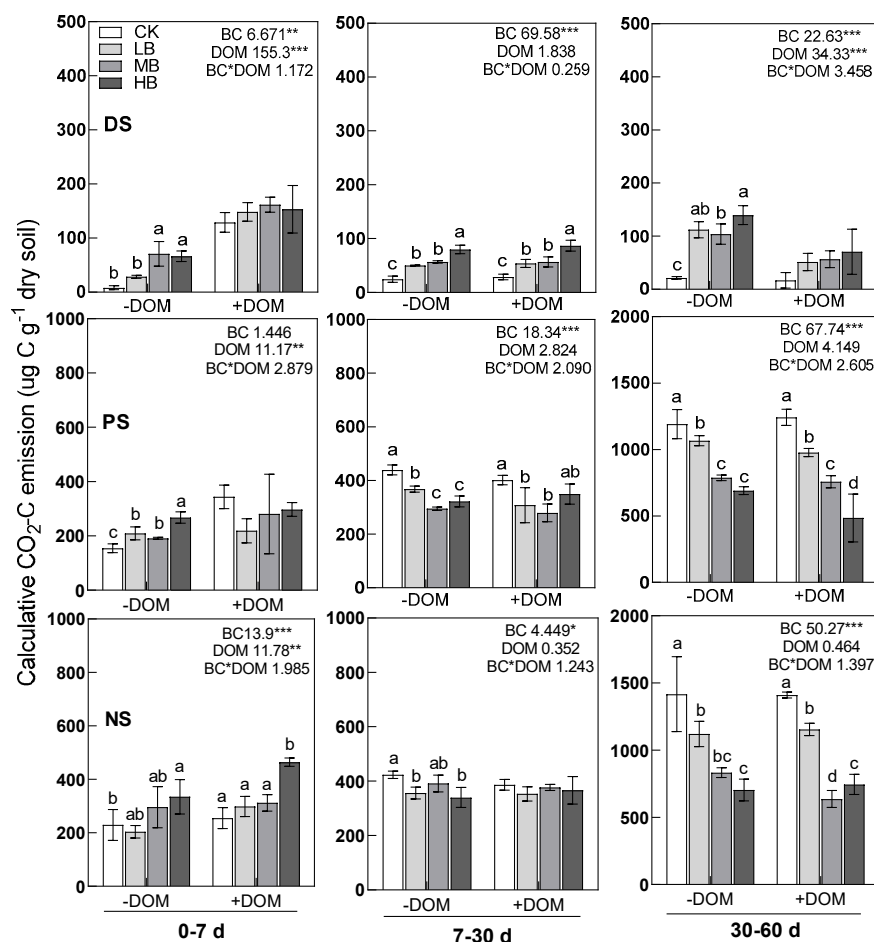

**Figure S1.** Effects of biochar (BC) and dissolved organic matter (DOM) addition on cumulative CO<sub>2</sub>-C emission in soils of degraded vegetation (DS), plantation (PS), and secondary natural forest (NS) at three different incubation stages. Values are means  $\pm$  SDs. Different superscript letters indicate significant differences among biochar treatments under the same DOM treatment level. *F*-values of the two-way ANOVA of BC, DOM, and their interactions (BC\*DOM) are shown at each vegetation restoration stage. \*  $p < 0.05$ , \*\*  $p < 0.01$ , \*\*\*  $p < 0.001$
